# Supplementary material for: LPAR2 correlated with different prognosis and immune cell infiltration in head and neck squamous cell carcinoma and kidney renal clear cell carcinoma
Source: Hereditas. 2022 Mar 4;159:16. doi: 10.1186/s41065-022-00229-w (PMC8896370; doi:10.1186/s41065-022-00229-w)
Supplement: Supplementary file 2 — Addtional file 2: Table S2. Clinical characteristics of patients with HNSC in HPA. [file 41065_2022_229_MOESM2_ESM.xlsx]

## Sheet: Sheet1
Sample	Description	FPKM
TCGA-D6-A6EP-01A	62 years, male, white, stage:iii, alive, 424 days	26.5
TCGA-CV-7421-01A	76 years, male, white, stage:iva, dead, 2 days	25.5
TCGA-QK-A8Z7-01A	59 years, male, black or african american, stage:iva, alive, 392 days	23.5
TCGA-MT-A7BN-01A	74 years, male, white, stage:iva, alive, 469 days	23.3
TCGA-CV-A6JU-01A	61 years, female, white, stage:ivb, alive, 110 days	21.6
TCGA-CV-A6JM-01A	85 years, male, white, dead, 194 days	20.7
TCGA-CN-A63V-01A	59 years, male, white, stage:iva, alive, 679 days	20
TCGA-BA-A6D8-01A	59 years, male, black or african american, stage:iva, alive, 850 days	18.8
TCGA-UF-A719-01A	54 years, male, stage:ii, alive, 1663 days	17.7
TCGA-CR-7370-01A	72 years, female, white, alive, 105 days	17.7
TCGA-QK-A8Z8-01A	60 years, female, black or african american, stage:ivc, dead, 171 days	17.6
TCGA-CN-A63U-01A	50 years, male, white, stage:iva, alive, 964 days	17.6
TCGA-TN-A7HL-01A	59 years, male, white, stage:iva, alive, 619 days	17.1
TCGA-TN-A7HI-01A	56 years, male, white, stage:iva, alive, 412 days	17
TCGA-CV-7407-01A	67 years, female, white, stage:ii, dead, 1081 days	16.1
TCGA-BB-A5HU-01A	47 years, male, white, stage:iva, alive, 782 days	15.8
TCGA-IQ-A61I-01A	63 years, male, black or african american, stage:iva, dead, 2 days	15.8
TCGA-BB-4225-01A	73 years, male, white, alive, 146 days	15.5
TCGA-MZ-A6I9-01A	68 years, male, white, dead, 489 days	15.2
TCGA-CR-5250-01A	71 years, male, white, alive, 799 days	15.1
TCGA-CN-A641-01A	47 years, male, white, stage:iva, alive, 367 days	15.1
TCGA-CR-6467-01A	59 years, male, white, stage:iii, alive, 1777 days	15
TCGA-CN-6023-01A	73 years, male, white, stage:iva, alive, 1584 days	14.7
TCGA-CN-A6UY-01A	57 years, male, white, stage:iva, alive, 713 days	14.1
TCGA-CR-6487-01A	50 years, male, white, stage:i, alive, 234 days	13.4
TCGA-CX-A4AQ-01A	56 years, male, white, stage:iva, alive, 1555 days	13.3
TCGA-CV-6960-01A	49 years, male, black or african american, stage:iii, dead, 862 days	13.2
TCGA-BB-A6UM-01A	52 years, male, white, stage:iii, alive, 393 days	13
TCGA-CN-5359-01A	59 years, male, white, stage:iva, dead, 377 days	12.7
TCGA-BA-6869-01A	62 years, male, white, stage:iii, alive, 644 days	12.6
TCGA-BB-4228-01A	50 years, male, white, stage:iii, alive, 559 days	12.5
TCGA-H7-A76A-01A	57 years, male, white, alive, 637 days	12.4
TCGA-BA-6872-01A	47 years, male, white, dead, 384 days	12.3
TCGA-CR-7374-01A	67 years, female, white, alive, 30 days	12.3
TCGA-CV-A45Z-01A	75 years, male, white, dead, 1466 days	12.2
TCGA-D6-A6ES-01A	50 years, male, white, stage:iva, alive, 389 days	12.2
TCGA-CV-A45Y-01A	61 years, male, american indian or alaska native, stage:iva, dead, 2703 days	12.1
TCGA-CN-A6V6-01A	59 years, male, white, stage:iva, alive, 635 days	12
TCGA-CV-5432-01A	68 years, male, white, stage:iii, alive, 3930 days	12
TCGA-CV-6433-01A	57 years, male, white, stage:ii, alive, 641 days	11.8
TCGA-P3-A5QE-01A	49 years, male, white, stage:iii, alive, 1559 days	11.7
TCGA-MZ-A5BI-01A	53 years, male, white, dead, 217 days	11.7
TCGA-CV-5443-01A	63 years, male, black or african american, stage:iii, alive, 2784 days	11.6
TCGA-QK-A6V9-01A	56 years, male, white, stage:ii, alive, 833 days	11.5
TCGA-CV-5976-01A	50 years, male, white, stage:iva, alive, 1478 days	11.5
TCGA-QK-A64Z-01A	79 years, female, white, stage:iva, dead, 641 days	11.3
TCGA-T2-A6WZ-01A	53 years, male, white, dead, 484 days	11.3
TCGA-CV-7263-01A	64 years, male, black or african american, stage:ii, dead, 560 days	11
TCGA-CV-7238-01A	69 years, female, white, stage:ii, alive, 2727 days	11
TCGA-CN-A497-01A	63 years, male, stage:iii, alive, 1065 days	10.9
TCGA-D6-A6EN-01A	72 years, male, white, stage:iii, alive, 687 days	10.9
TCGA-T3-A92M-01A	52 years, male, black or african american, stage:iva, alive, 417 days	10.7
TCGA-QK-A6VB-01A	66 years, male, white, stage:iva, alive, 641 days	10.7
TCGA-D6-A6EO-01A	44 years, male, white, stage:iva, alive, 759 days	10.7
TCGA-BA-A8YP-01A	50 years, male, black or african american, stage:ivb, alive, 499 days	10.6
TCGA-CV-A6JE-01A	78 years, male, white, alive, 1075 days	10.5
TCGA-BA-6870-01A	60 years, female, black or african american, dead, 451 days	10.4
TCGA-CV-A6JT-01A	65 years, male, white, stage:ii, alive, 852 days	10.4
TCGA-QK-A6IG-01A	69 years, male, white, stage:iii, dead, 222 days	10.4
TCGA-CV-7091-01A	54 years, male, white, stage:i, alive, 3381 days	10.3
TCGA-CR-5243-01A	51 years, male, white, alive, 2562 days	10.3
TCGA-CV-7254-01A	55 years, male, white, stage:ii, dead, 1459 days	10.2
TCGA-P3-A6T6-01A	53 years, male, white, stage:iva, dead, 395 days	10.2
TCGA-CV-A6JD-01A	82 years, female, white, dead, 182 days	10.2
TCGA-CN-A63T-01A	60 years, male, white, stage:iva, alive, 225 days	10.2
TCGA-HL-7533-01A	65 years, male, white, alive, 1057 days	10.2
TCGA-CV-A45W-01A	76 years, male, white, stage:ii, dead, 1398 days	10.1
TCGA-KU-A6H7-01A	55 years, female, white, stage:iva, alive, 586 days	10.1
TCGA-D6-6823-01A	50 years, male, white, stage:ii, alive, 701 days	10.1
TCGA-CR-7398-01A	53 years, female, white, stage:ii, alive, 156 days	10.1
TCGA-UF-A7JS-01A	59 years, male, white, stage:iva, dead, 680 days	10.1
TCGA-D6-A74Q-01A	67 years, male, white, stage:iva, alive, 710 days	10.1
TCGA-UF-A7JD-01A	71 years, male, stage:iva, dead, 739 days	9.9
TCGA-T2-A6WX-01A	73 years, female, white, dead, 209 days	9.9
TCGA-CQ-A4CH-01A	58 years, male, asian, stage:ii, dead, 379 days	9.9
TCGA-CR-7383-01A	79 years, female, white, stage:i, dead, 521 days	9.9
TCGA-IQ-A6SH-01A	55 years, male, black or african american, stage:iii, alive, 471 days	9.8
TCGA-D6-6517-01A	59 years, male, white, stage:iii, alive, 292 days	9.8
TCGA-CN-A49C-01A	67 years, male, white, alive, 645 days	9.8
TCGA-CR-6480-01A	53 years, male, white, alive, 362 days	9.7
TCGA-BB-8601-01A	84 years, male, black or african american, stage:iii, alive, 624 days	9.7
TCGA-P3-A6SW-01A	50 years, male, white, stage:ivb, alive, 1120 days	9.7
TCGA-CR-6473-01A	68 years, male, white, alive, 1125 days	9.7
TCGA-D6-A6EK-01A	67 years, male, white, stage:iii, alive, 875 days	9.7
TCGA-CV-7438-01A	87 years, female, white, stage:i, dead, 194 days	9.6
TCGA-P3-A6T5-01A	79 years, female, white, stage:iva, dead, 882 days	9.6
TCGA-CV-7424-01A	67 years, male, asian, stage:iva, dead, 453 days	9.6
TCGA-UF-A71A-01A	67 years, male, white, stage:iva, dead, 86 days	9.6
TCGA-CR-6481-01A	47 years, male, white, alive, 311 days	9.5
TCGA-CQ-7068-01A	80 years, female, white, stage:ii, alive, 1309 days	9.5
TCGA-RS-A6TP-01A	58 years, male, white, stage:ii, alive, 516 days	9.5
TCGA-CV-7261-01A	57 years, male, white, stage:iva, alive, 1512 days	9.4
TCGA-BB-4223-01A	48 years, male, white, stage:iva, alive, 3221 days	9.4
TCGA-CQ-5333-01A	74 years, male, white, stage:ii, dead, 341 days	9.4
TCGA-CV-6939-01A	60 years, male, white, stage:iva, dead, 666 days	9.3
TCGA-UF-A7JO-01A	79 years, female, white, stage:iva, dead, 631 days	9.3
TCGA-CR-7402-01A	68 years, male, white, alive, 911 days	9.3
TCGA-CV-A460-01A	72 years, male, white, dead, 1838 days	9.3
TCGA-HD-A6I0-01A	56 years, male, white, stage:iva, alive, 210 days	9.1
TCGA-CV-5430-01A	61 years, male, white, stage:iva, alive, 4241 days	9.1
TCGA-CN-A6V7-01A	40 years, male, white, stage:iva, alive, 594 days	9.1
TCGA-BA-5555-01A	54 years, male, black or african american, stage:iva, alive, 520 days	9
TCGA-BA-A6DE-01A	70 years, female, white, stage:ii, alive, 440 days	9
TCGA-CV-A464-01A	48 years, male, white, stage:iii, alive, 1722 days	8.9
TCGA-KU-A66T-01A	53 years, female, white, stage:iva, alive, 552 days	8.9
TCGA-UF-A71B-01A	50 years, male, white, stage:iva, alive, 1506 days	8.9
TCGA-BA-5559-01A	72 years, male, white, dead, 2083 days	8.8
TCGA-UF-A7JV-01A	62 years, female, white, stage:iva, dead, 90 days	8.8
TCGA-CQ-A4CD-01A	69 years, male, white, stage:iva, alive, 1022 days	8.8
TCGA-CN-A498-01A	61 years, female, white, stage:iii, dead, 773 days	8.8
TCGA-CQ-A4C9-01A	56 years, male, stage:iii, alive, 707 days	8.7
TCGA-QK-A6IH-01A	65 years, female, white, stage:ivb, alive, 653 days	8.7
TCGA-CQ-A4C7-01A	88 years, male, white, stage:iii, dead, 353 days	8.7
TCGA-KU-A66S-01A	69 years, female, white, stage:iii, dead, 406 days	8.7
TCGA-CR-6470-01A	38 years, male, white, stage:ii, alive, 1521 days	8.6
TCGA-CV-7242-01A	60 years, female, white, stage:ii, alive, 1095 days	8.6
TCGA-UF-A7JH-01A	59 years, male, black or african american, stage:iva, alive, 896 days	8.5
TCGA-CN-6012-01A	66 years, male, white, stage:iva, alive, 1460 days	8.5
TCGA-P3-A5Q6-01A	49 years, male, white, stage:iva, dead, 480 days	8.5
TCGA-QK-A652-01A	60 years, male, white, stage:iii, alive, 645 days	8.5
TCGA-BA-4078-01A	83 years, male, white, dead, 276 days	8.5
TCGA-QK-A6IF-01A	61 years, male, white, alive, 704 days	8.5
TCGA-DQ-7591-01A	62 years, male, white, alive, 622 days	8.5
TCGA-HD-A6HZ-01A	79 years, female, white, stage:iii, alive, 111 days	8.4
TCGA-WA-A7H4-01A	69 years, male, white, stage:ii, alive, 443 days	8.3
TCGA-CN-5366-01A	51 years, male, white, stage:iva, dead, 360 days	8.3
TCGA-CV-7415-01A	60 years, male, white, stage:iva, dead, 695 days	8.3
TCGA-CV-6962-01A	66 years, male, white, stage:iva, dead, 126 days	8.2
TCGA-CV-A6JN-01A	53 years, male, white, alive, 906 days	8.1
TCGA-CQ-5332-01A	87 years, male, white, stage:iii, dead, 317 days	8.1
TCGA-IQ-A61E-01A	55 years, female, white, stage:iii, alive, 1147 days	8.1
TCGA-D6-A6EM-01A	65 years, female, white, stage:iii, alive, 232 days	8.1
TCGA-CV-7235-01A	67 years, male, white, stage:ii, alive, 2347 days	8.1
TCGA-CN-4735-01A	52 years, male, white, stage:iva, alive, 1737 days	8.1
TCGA-UP-A6WW-01A	58 years, male, white, alive, 518 days	8.1
TCGA-CN-6024-01A	66 years, male, white, stage:iva, dead, 337 days	8.1
TCGA-CN-A642-01A	57 years, male, white, stage:ivb, dead, 82 days	8
TCGA-T2-A6X0-01A	49 years, male, white, alive, 216 days	8
TCGA-CQ-6219-01A	50 years, female, white, stage:iva, dead, 479 days	8
TCGA-CR-6488-01A	68 years, female, white, stage:ii, alive, 379 days	7.9
TCGA-BA-7269-01A	61 years, male, white, stage:iii, alive, 1273 days	7.9
TCGA-CV-6003-01A	50 years, female, white, stage:iii, alive, 1665 days	7.9
TCGA-CV-A45R-01A	46 years, male, white, stage:iii, alive, 5480 days	7.9
TCGA-CN-5356-01A	56 years, male, white, stage:iii, alive, 1409 days	7.9
TCGA-UF-A7JF-01A	80 years, male, white, stage:iva, alive, 1686 days	7.9
TCGA-QK-AA3J-01A	69 years, male, black or african american, stage:i, alive, 466 days	7.8
TCGA-D6-A4ZB-01A	61 years, male, white, stage:iii, alive, 376 days	7.8
TCGA-CV-6441-01A	60 years, male, white, stage:iii, dead, 292 days	7.8
TCGA-P3-A6T0-01A	47 years, female, white, stage:iva, alive, 578 days	7.8
TCGA-CV-5441-01A	58 years, male, white, stage:iva, alive, 2886 days	7.8
TCGA-QK-A8Z9-01B	56 years, male, black or african american, stage:iva, dead, 449 days	7.7
TCGA-WA-A7GZ-01A	58 years, male, white, dead, 625 days	7.7
TCGA-P3-A6T2-01A	45 years, male, white, stage:iva, alive, 2298 days	7.7
TCGA-CV-A6JZ-01A	68 years, male, white, stage:ii, alive, 714 days	7.7
TCGA-UF-A71E-01A	63 years, male, white, stage:iva, dead, 1504 days	7.6
TCGA-UF-A71D-01A	54 years, female, white, stage:iva, alive, 1461 days	7.6
TCGA-CV-6948-01A	79 years, female, white, stage:ivb, dead, 1289 days	7.6
TCGA-UF-A7J9-01A	75 years, male, white, stage:iva, alive, 1358 days	7.6
TCGA-CV-7250-01A	64 years, male, white, stage:iva, dead, 2900 days	7.6
TCGA-CR-7399-01A	60 years, female, white, stage:iva, alive, 181 days	7.6
TCGA-BB-A5HZ-01A	65 years, male, white, stage:iva, alive, 827 days	7.6
TCGA-CV-6942-01A	73 years, female, white, stage:ii, alive, 4282 days	7.6
TCGA-CV-7422-01A	60 years, female, white, stage:iva, dead, 1037 days	7.6
TCGA-BA-6871-01A	75 years, male, white, dead, 108 days	7.6
TCGA-CV-5442-01A	76 years, female, white, stage:iva, alive, 2327 days	7.5
TCGA-CV-7428-01A	47 years, male, white, stage:iva, dead, 1671 days	7.5
TCGA-HD-8635-01A	61 years, female, white, stage:iii, alive, 695 days	7.5
TCGA-CN-6013-01A	56 years, male, white, stage:iva, dead, 727 days	7.5
TCGA-CV-7247-01A	55 years, male, white, stage:iii, dead, 577 days	7.5
TCGA-IQ-7631-01A	60 years, female, white, stage:ii, alive, 1172 days	7.4
TCGA-CV-5979-01A	26 years, male, white, stage:iva, alive, 1315 days	7.4
TCGA-CQ-5323-01A	82 years, male, white, stage:i, alive, 1466 days	7.4
TCGA-MT-A67D-01A	55 years, male, white, stage:ii, alive, 56 days	7.3
TCGA-CN-6010-01A	53 years, male, white, stage:iva, alive, 1523 days	7.3
TCGA-HD-8224-01A	63 years, male, white, stage:iva, dead, 446 days	7.3
TCGA-CN-5374-01A	56 years, female, white, stage:iva, dead, 1732 days	7.3
TCGA-CN-4727-01A	56 years, male, white, stage:iva, alive, 1560 days	7.3
TCGA-CN-6021-01A	63 years, female, white, dead, 276 days	7.3
TCGA-CN-A63W-01A	48 years, female, white, stage:iva, dead, 377 days	7.2
TCGA-CN-6988-01A	47 years, male, white, stage:iva, alive, 318 days	7.2
TCGA-D6-8568-01A	62 years, male, white, stage:ii, alive, 759 days	7.2
TCGA-BA-A4IF-01A	59 years, male, white, alive, 895 days	7.2
TCGA-D6-A6EQ-01A	57 years, male, white, stage:iva, alive, 368 days	7.2
TCGA-P3-A6T8-01A	54 years, male, white, stage:iva, alive, 400 days	7.2
TCGA-P3-A5Q5-01A	54 years, male, white, stage:iva, alive, 910 days	7.1
TCGA-CV-7414-01A	78 years, male, white, stage:iva, dead, 14 days	7.1
TCGA-CV-5431-01A	73 years, male, white, stage:iva, dead, 522 days	7.1
TCGA-HD-A633-01A	74 years, male, white, stage:iva, alive, 421 days	7.1
TCGA-CR-6493-01A	69 years, male, black or african american, stage:iva, dead, 282 days	7.1
TCGA-CR-6472-01A	59 years, male, white, alive, 1050 days	7.1
TCGA-CR-7404-01A	53 years, male, white, alive, 1472 days	7.1
TCGA-T2-A6X2-01A	82 years, male, white, stage:iii, alive, 987 days	7.1
TCGA-P3-A6T3-01A	49 years, male, white, stage:iva, dead, 577 days	7.1
TCGA-CR-7371-01A	45 years, female, white, stage:iii, dead, 94 days	7
TCGA-UF-A718-01A	62 years, male, white, stage:iva, alive, 1971 days	7
TCGA-F7-A61S-01A	62 years, male, white, stage:iii, alive, 576 days	7
TCGA-CQ-6228-01A	71 years, female, white, stage:iva, dead, 456 days	7
TCGA-QK-A6VC-01A	62 years, female, black or african american, stage:iva, alive, 600 days	7
TCGA-BA-4077-01B	45 years, female, white, stage:iva, dead, 1134 days	7
TCGA-MT-A67F-01A	60 years, female, white, stage:iva, alive, 384 days	7
TCGA-CR-5249-01A	35 years, female, white, stage:ii, alive, 1152 days	7
TCGA-CV-5977-01A	66 years, male, white, stage:iva, alive, 1840 days	7
TCGA-CX-7219-01A	47 years, male, black or african american, stage:iva, alive, 1045 days	7
TCGA-CN-6992-01A	61 years, male, white, stage:iva, alive, 1066 days	6.9
TCGA-CV-6933-01A	53 years, male, white, stage:iii, dead, 2741 days	6.9
TCGA-MZ-A7D7-01A	51 years, male, white, stage:iva, alive, 547 days	6.9
TCGA-P3-A5QF-01A	49 years, male, white, stage:iva, dead, 330 days	6.9
TCGA-CV-6951-01A	57 years, male, white, stage:iva, dead, 915 days	6.9
TCGA-CV-A461-01A	65 years, male, white, dead, 2064 days	6.9
TCGA-CN-6016-01A	64 years, male, white, stage:iva, alive, 1443 days	6.8
TCGA-CV-A468-01A	42 years, male, stage:iva, dead, 464 days	6.8
TCGA-CR-7385-01A	42 years, male, white, alive, 997 days	6.8
TCGA-DQ-5629-01A	64 years, male, white, dead, 941 days	6.8
TCGA-CQ-7065-01A	40 years, male, asian, stage:ii, alive, 1628 days	6.8
TCGA-CN-6997-01A	66 years, male, white, stage:iva, dead, 988 days	6.8
TCGA-CN-5360-01A	68 years, male, white, stage:iva, alive, 2169 days	6.8
TCGA-CV-A45U-01A	59 years, male, white, stage:iva, dead, 1079 days	6.8
TCGA-UF-A7JA-01A	66 years, female, white, stage:iva, alive, 2265 days	6.7
TCGA-CV-5440-01A	52 years, male, white, stage:iva, alive, 3270 days	6.7
TCGA-D6-A4Z9-01A	59 years, male, white, stage:iva, alive, 539 days	6.7
TCGA-CQ-7063-01A	59 years, female, white, stage:i, alive, 2133 days	6.7
TCGA-CN-4736-01A	70 years, female, white, dead, 395 days	6.7
TCGA-F7-8489-01A	48 years, male, white, stage:ii, alive, 658 days	6.7
TCGA-CV-7437-01A	77 years, male, stage:ii, dead, 506 days	6.7
TCGA-CQ-A4CI-01A	73 years, male, white, stage:iii, alive, 950 days	6.7
TCGA-CV-7099-01A	85 years, female, white, stage:ii, dead, 243 days	6.6
TCGA-CV-6935-01A	67 years, male, white, stage:iva, dead, 295 days	6.6
TCGA-CV-A6K1-01A	65 years, male, white, stage:iva, alive, 685 days	6.6
TCGA-CQ-A4CG-01A	78 years, female, white, stage:iii, dead, 430 days	6.6
TCGA-CV-6941-01A	51 years, male, white, stage:iii, dead, 342 days	6.6
TCGA-F7-A61V-01A	54 years, male, white, stage:ii, alive, 759 days	6.6
TCGA-BB-8596-01A	69 years, female, white, stage:iva, alive, 2161 days	6.6
TCGA-CV-7236-01A	77 years, female, white, stage:iva, dead, 144 days	6.6
TCGA-CV-6956-01A	67 years, male, white, stage:iii, dead, 217 days	6.6
TCGA-CV-7104-01A	61 years, female, white, stage:iva, dead, 393 days	6.6
TCGA-DQ-5630-01A	73 years, male, white, alive, 1030 days	6.5
TCGA-IQ-A6SG-01A	61 years, female, white, stage:iii, alive, 579 days	6.5
TCGA-CN-A6V3-01A	61 years, male, white, stage:iva, alive, 742 days	6.5
TCGA-F7-7848-01A	47 years, male, white, stage:iva, alive, 1131 days	6.5
TCGA-CR-5248-01A	53 years, male, white, alive, 1663 days	6.5
TCGA-CR-7390-01A	67 years, male, white, stage:iva, alive, 1508 days	6.5
TCGA-CV-A6K2-01A	79 years, male, white, stage:iva, dead, 317 days	6.5
TCGA-CN-5367-01A	60 years, female, white, stage:iva, dead, 352 days	6.5
TCGA-CV-7446-01A	66 years, male, white, stage:iva, dead, 1093 days	6.4
TCGA-CN-6011-01A	57 years, male, white, stage:iva, alive, 933 days	6.4
TCGA-BB-4217-01A	68 years, male, black or african american, stage:iva, alive, 187 days	6.4
TCGA-HD-7753-01A	62 years, male, black or african american, stage:i, alive, 866 days	6.4
TCGA-CV-A6JO-01B	69 years, male, white, stage:iva, dead, 197 days	6.4
TCGA-BA-A6DJ-01A	62 years, male, asian, stage:iva, dead, 407 days	6.4
TCGA-F7-8298-01A	58 years, male, white, stage:i, alive, 995 days	6.3
TCGA-CN-6994-01A	67 years, male, white, stage:iva, alive, 1183 days	6.3
TCGA-CV-7177-01A	82 years, female, white, stage:ii, dead, 663 days	6.3
TCGA-DQ-5631-01A	52 years, male, white, dead, 548 days	6.3
TCGA-CV-7253-01A	58 years, male, black or african american, stage:iva, dead, 361 days	6.3
TCGA-BA-A6DD-01A	44 years, male, black or african american, stage:iva, dead, 173 days	6.3
TCGA-CQ-5330-01A	69 years, female, white, stage:iva, alive, 1897 days	6.2
TCGA-CV-6936-01A	68 years, male, white, stage:iva, dead, 166 days	6.2
TCGA-CN-A499-01A	60 years, female, white, stage:ii, alive, 717 days	6.2
TCGA-CV-5436-01A	65 years, male, stage:iva, dead, 584 days	6.2
TCGA-F7-A620-01A	47 years, male, white, stage:iii, alive, 543 days	6.2
TCGA-CR-7380-01A	58 years, male, white, stage:ivb, dead, 606 days	6.2
TCGA-TN-A7HJ-01A	51 years, male, white, stage:iva, alive, 403 days	6.2
TCGA-CQ-A4C6-01A	63 years, male, asian, stage:ii, alive, 1353 days	6.2
TCGA-BA-6868-01B	53 years, male, black or african american, dead, 472 days	6.2
TCGA-CV-7090-01A	39 years, male, white, stage:ii, alive, 5252 days	6.1
TCGA-RS-A6TO-01A	82 years, female, white, stage:iva, dead, 387 days	6.1
TCGA-CQ-A4CB-01A	59 years, male, stage:iii, alive, 893 days	6.1
TCGA-D6-6827-01A	55 years, female, white, stage:i, alive, 568 days	6.1
TCGA-CN-A49A-01A	60 years, male, white, stage:ivb, dead, 526 days	6.1
TCGA-CV-5439-01A	62 years, male, white, stage:iva, dead, 546 days	6.1
TCGA-IQ-A61H-01A	76 years, male, white, stage:ii, alive, 1138 days	6.1
TCGA-QK-A6IJ-01A	71 years, male, white, stage:iii, alive, 387 days	6.1
TCGA-CN-6022-01A	49 years, male, white, stage:iva, dead, 281 days	6.1
TCGA-CX-7082-01A	82 years, male, white, stage:iva, dead, 11 days	6.1
TCGA-P3-A6SX-01A	67 years, male, white, stage:iii, dead, 1430 days	6
TCGA-CR-7389-01A	55 years, male, black or african american, alive, 392 days	6
TCGA-HD-7229-01A	60 years, male, white, stage:iva, alive, 1027 days	6
TCGA-BA-A4IH-01A	57 years, male, white, alive, 622 days	6
TCGA-CQ-6218-01A	52 years, female, white, stage:iva, alive, 1253 days	6
TCGA-P3-A5QA-01A	41 years, male, stage:i, alive, 2182 days	6
TCGA-CN-4739-01A	71 years, male, white, stage:iva, dead, 1394 days	6
TCGA-CV-A45Q-01A	69 years, female, white, dead, 5152 days	6
TCGA-BA-5152-01A	56 years, male, white, stage:iva, alive, 1288 days	6
TCGA-CV-6940-01A	80 years, female, white, stage:iii, dead, 804 days	6
TCGA-P3-A6T7-01A	55 years, male, white, stage:iva, dead, 487 days	6
TCGA-CV-7432-01A	79 years, male, white, stage:ii, dead, 2570 days	5.9
TCGA-CV-7418-01A	62 years, male, black or african american, stage:iva, dead, 789 days	5.9
TCGA-BA-A6DB-01A	24 years, female, white, stage:i, alive, 216 days	5.9
TCGA-CV-6950-01A	64 years, male, white, stage:iva, dead, 459 days	5.9
TCGA-CQ-6229-01A	61 years, male, white, stage:ii, alive, 1179 days	5.9
TCGA-BA-6873-01A	28 years, male, white, stage:iva, alive, 122 days	5.9
TCGA-CR-6482-01A	62 years, male, black or african american, alive, 345 days	5.9
TCGA-CV-7248-01A	63 years, female, black or african american, stage:iva, dead, 521 days	5.8
TCGA-CV-5435-01A	57 years, male, white, stage:iva, dead, 2319 days	5.8
TCGA-CV-7252-01A	62 years, female, black or african american, stage:iva, dead, 151 days	5.8
TCGA-BB-A6UO-01A	61 years, female, white, stage:iva, dead, 268 days	5.8
TCGA-CV-5966-01A	63 years, female, white, stage:iva, dead, 545 days	5.8
TCGA-H7-A6C4-01A	35 years, female, white, stage:iva, dead, 414 days	5.8
TCGA-UF-A7JK-01A	59 years, male, stage:iva, dead, 424 days	5.8
TCGA-F7-A622-01A	75 years, male, white, stage:iii, dead, 359 days	5.8
TCGA-CR-6471-01A	58 years, male, white, stage:iva, dead, 1202 days	5.7
TCGA-QK-AA3K-01A	60 years, male, black or african american, stage:iva, alive, 253 days	5.7
TCGA-CV-7423-01A	65 years, male, white, stage:ii, dead, 3059 days	5.7
TCGA-CN-4731-01A	63 years, female, white, stage:iva, dead, 998 days	5.7
TCGA-CN-4733-01A	61 years, male, white, stage:iii, alive, 1586 days	5.7
TCGA-BB-4224-01A	52 years, male, white, stage:iva, alive, 278 days	5.7
TCGA-CV-7103-01A	49 years, male, white, stage:iva, dead, 1591 days	5.7
TCGA-CV-A6K0-01B	58 years, male, white, stage:i, alive, 606 days	5.7
TCGA-CV-A45T-01A	64 years, female, white, dead, 4856 days	5.7
TCGA-F7-A50G-01A	66 years, male, white, stage:iii, alive, 616 days	5.6
TCGA-BB-4227-01A	66 years, male, white, stage:iva, alive, 134 days	5.6
TCGA-CQ-7069-01A	77 years, female, white, stage:ii, alive, 1274 days	5.6
TCGA-UF-A7JJ-01A	69 years, male, stage:iva, alive, 549 days	5.5
TCGA-CV-6953-01A	80 years, female, white, stage:iii, dead, 1641 days	5.5
TCGA-BA-5556-01A	58 years, female, white, stage:ii, alive, 725 days	5.5
TCGA-CV-7433-01A	49 years, male, white, stage:iva, dead, 601 days	5.5
TCGA-HD-A634-01A	57 years, male, white, stage:iva, dead, 130 days	5.5
TCGA-QK-A6II-01A	52 years, male, white, stage:iva, dead, 284 days	5.5
TCGA-CQ-6227-01A	77 years, male, white, stage:iva, dead, 129 days	5.5
TCGA-IQ-A61G-01A	57 years, male, white, stage:iva, alive, 360 days	5.5
TCGA-CV-7101-01A	80 years, male, white, stage:ii, dead, 160 days	5.4
TCGA-4P-AA8J-01A	66 years, male, black or african american, stage:iva, alive, 102 days	5.4
TCGA-CN-5373-01A	55 years, female, white, stage:i, alive, 1584 days	5.4
TCGA-C9-A480-01A	45 years, female, asian, stage:iii, alive, 386 days	5.4
TCGA-D6-6824-01A	62 years, male, white, stage:iva, alive, 77 days	5.4
TCGA-CN-A49B-01A	71 years, male, white, stage:iii, alive, 904 days	5.4
TCGA-CR-6492-01A	78 years, male, white, stage:iii, alive, 479 days	5.4
TCGA-F7-A61W-01A	51 years, male, asian, stage:iva, alive, 14 days	5.4
TCGA-CQ-5325-01A	65 years, male, white, stage:i, dead, 654 days	5.3
TCGA-UF-A7JT-01A	72 years, female, white, stage:iva, dead, 993 days	5.3
TCGA-CV-6937-01A	71 years, male, white, stage:ii, dead, 624 days	5.3
TCGA-DQ-5625-01A	52 years, female, white, dead, 1133 days	5.3
TCGA-CR-7401-01A	64 years, male, white, stage:i, alive, 1077 days	5.3
TCGA-HD-8634-01A	51 years, female, white, stage:i, dead, 385 days	5.3
TCGA-BA-A6DI-01A	62 years, male, black or african american, dead, 336 days	5.3
TCGA-CV-6938-01A	87 years, male, white, stage:ii, dead, 144 days	5.3
TCGA-H7-8502-01A	50 years, male, white, stage:iva, alive, 458 days	5.3
TCGA-CN-4741-01A	75 years, male, white, stage:iva, alive, 2239 days	5.3
TCGA-BA-5151-01A	72 years, male, white, stage:iva, alive, 722 days	5.3
TCGA-CN-5361-01A	80 years, male, white, stage:iva, dead, 2120 days	5.2
TCGA-CV-6961-01A	61 years, male, white, stage:ii, dead, 76 days	5.2
TCGA-CR-7372-01A	45 years, male, white, stage:i, alive, 759 days	5.2
TCGA-CN-4723-01A	67 years, male, white, stage:iva, alive, 1699 days	5.2
TCGA-CR-7379-01A	78 years, female, white, stage:iva, alive, 1036 days	5.2
TCGA-CV-7425-01A	77 years, female, white, stage:iii, dead, 1718 days	5.2
TCGA-CV-7435-01A	57 years, female, white, stage:iva, dead, 4680 days	5.2
TCGA-CQ-5324-01A	59 years, male, white, stage:iii, alive, 1593 days	5.2
TCGA-HD-8314-01A	58 years, male, white, stage:iii, alive, 670 days	5.2
TCGA-CV-A45X-01A	47 years, male, white, stage:iva, dead, 198 days	5.2
TCGA-CN-5365-01A	38 years, male, white, stage:ivb, dead, 351 days	5.1
TCGA-BA-5153-01A	51 years, male, white, dead, 1762 days	5.1
TCGA-CV-7410-01A	61 years, male, white, stage:iii, dead, 6417 days	5.1
TCGA-CR-7373-01A	66 years, male, white, stage:iva, alive, 889 days	5.1
TCGA-IQ-7630-01A	49 years, male, white, stage:ii, alive, 485 days	5.1
TCGA-BA-A4IG-01A	77 years, male, white, alive, 855 days	5.1
TCGA-CV-6952-01A	65 years, female, white, stage:iva, dead, 185 days	5.1
TCGA-BA-A6DL-01A	59 years, male, white, alive, 623 days	5.1
TCGA-CN-4737-01A	20 years, male, white, stage:iva, alive, 625 days	5.1
TCGA-CV-5978-01A	53 years, female, black or african american, stage:ivb, dead, 215 days	5
TCGA-CV-5444-01A	64 years, male, black or african american, stage:iva, alive, 2437 days	5
TCGA-CV-5434-01A	60 years, male, black or african american, stage:iva, dead, 3314 days	5
TCGA-CV-5970-01A	59 years, male, white, stage:iva, dead, 406 days	5
TCGA-HD-7832-01A	52 years, male, white, stage:iva, alive, 836 days	5
TCGA-CN-6989-01A	64 years, male, white, stage:iva, dead, 980 days	5
TCGA-CN-4730-01A	62 years, male, white, stage:iva, alive, 817 days	5
TCGA-CQ-5329-01A	46 years, female, white, stage:ii, alive, 2143 days	4.9
TCGA-BA-4076-01A	39 years, male, white, dead, 415 days	4.9
TCGA-CV-7255-01A	32 years, female, white, stage:iva, dead, 64 days	4.9
TCGA-P3-A6T4-01A	54 years, male, white, stage:iva, dead, 62 days	4.9
TCGA-CR-7388-01A	70 years, female, white, dead, 823 days	4.9
TCGA-CN-4738-01A	53 years, male, white, stage:iva, dead, 436 days	4.9
TCGA-CV-7178-01A	64 years, female, white, stage:iva, dead, 2166 days	4.9
TCGA-CR-7395-01A	80 years, female, white, stage:ii, alive, 930 days	4.9
TCGA-CV-7568-01A	48 years, female, white, stage:iva, dead, 927 days	4.9
TCGA-CQ-7072-01A	51 years, male, white, stage:ii, alive, 2359 days	4.9
TCGA-CV-6959-01A	48 years, male, white, stage:iii, dead, 256 days	4.8
TCGA-CV-7434-01A	64 years, male, white, stage:iva, dead, 218 days	4.8
TCGA-CN-5364-01A	55 years, male, white, stage:iva, dead, 493 days	4.8
TCGA-CV-6945-01A	41 years, male, white, stage:iva, dead, 366 days	4.8
TCGA-CV-5973-01A	62 years, female, white, stage:iii, alive, 2641 days	4.8
TCGA-HD-A4C1-01A	41 years, female, black or african american, stage:iva, alive, 11 days	4.7
TCGA-CV-7430-01A	56 years, male, white, stage:iva, dead, 495 days	4.7
TCGA-CX-7086-01A	53 years, male, black or african american, stage:iii, alive, 573 days	4.7
TCGA-F7-A50I-01A	72 years, male, white, stage:iva, alive, 92 days	4.7
TCGA-CQ-6224-01A	52 years, male, white, stage:iva, alive, 1721 days	4.7
TCGA-F7-A50J-01A	67 years, female, white, stage:iii, alive, 947 days	4.6
TCGA-CQ-5327-01A	61 years, female, asian, stage:iva, alive, 1660 days	4.6
TCGA-CN-4742-01A	48 years, female, white, stage:iva, dead, 397 days	4.6
TCGA-F7-A623-01A	70 years, male, white, stage:iva, alive, 616 days	4.6
TCGA-CR-7382-01A	49 years, male, white, stage:iva, alive, 796 days	4.6
TCGA-CR-5247-01A	48 years, male, black or african american, alive, 358 days	4.6
TCGA-CV-7089-01A	74 years, male, white, stage:iva, dead, 1972 days	4.6
TCGA-CN-5369-01A	90 years, female, white, stage:iva, dead, 380 days	4.6
TCGA-CV-7097-01A	53 years, male, white, stage:ii, dead, 385 days	4.5
TCGA-CN-5355-01A	64 years, male, black or african american, stage:iva, alive, 1278 days	4.5
TCGA-HD-7754-01A	69 years, male, white, stage:iva, alive, 783 days	4.5
TCGA-CN-4722-01A	61 years, female, white, stage:ii, alive, 1483 days	4.5
TCGA-CV-7245-01A	62 years, male, white, stage:iva, alive, 797 days	4.5
TCGA-D6-6515-01A	82 years, female, white, stage:ii, dead, 403 days	4.5
TCGA-BA-A6DG-01A	49 years, male, white, dead, 69 days	4.5
TCGA-CR-7369-01A	59 years, male, white, stage:iva, dead, 1090 days	4.5
TCGA-CQ-6225-01A	65 years, male, white, stage:iii, dead, 403 days	4.5
TCGA-CV-7100-01A	66 years, male, white, stage:iii, dead, 274 days	4.5
TCGA-D6-8569-01A	52 years, male, white, stage:ii, alive, 770 days	4.5
TCGA-DQ-5624-01A	43 years, female, white, alive, 1778 days	4.4
TCGA-CV-7095-01A	87 years, female, stage:ii, dead, 572 days	4.4
TCGA-CV-7406-01A	50 years, male, white, stage:ii, dead, 1748 days	4.4
TCGA-MT-A67A-01A	85 years, female, white, stage:i, alive, 914 days	4.3
TCGA-CR-7364-01A	66 years, male, white, stage:iii, alive, 1435 days	4.3
TCGA-CN-6996-01A	58 years, female, white, stage:iva, dead, 530 days	4.3
TCGA-CV-7416-01A	29 years, female, white, stage:iva, dead, 763 days	4.3
TCGA-CR-7365-01A	60 years, male, white, stage:iva, alive, 1191 days	4.3
TCGA-CQ-5326-01A	67 years, male, white, stage:iva, dead, 89 days	4.3
TCGA-UF-A7JC-01A	42 years, male, white, stage:iva, dead, 546 days	4.2
TCGA-CR-6474-01A	51 years, male, white, stage:iva, dead, 564 days	4.2
TCGA-CV-6954-01A	59 years, male, black or african american, stage:iva, dead, 2002 days	4.2
TCGA-H7-8501-01A	54 years, male, white, stage:iva, alive, 461 days	4.2
TCGA-CQ-A4CE-01A	76 years, female, stage:ii, alive, 897 days	4.2
TCGA-T3-A92N-01A	79 years, male, black or african american, stage:iva, dead, 95 days	4.2
TCGA-CQ-5334-01A	87 years, male, white, stage:iva, dead, 129 days	4.1
TCGA-BA-4074-01A	69 years, male, white, stage:iva, dead, 462 days	4.1
TCGA-CV-7180-01A	34 years, male, white, stage:ii, dead, 327 days	4.1
TCGA-IQ-A61O-01A	43 years, male, white, stage:iva, dead, 421 days	4.1
TCGA-IQ-7632-01A	68 years, female, white, stage:iva, alive, 441 days	4.1
TCGA-BA-A4II-01A	46 years, male, white, stage:ii, alive, 918 days	4.1
TCGA-CV-7440-01A	38 years, male, white, stage:ii, dead, 675 days	4
TCGA-DQ-7592-01A	57 years, male, american indian or alaska native, alive, 1143 days	4
TCGA-BB-A5HY-01A	64 years, male, white, stage:iva, dead, 321 days	4
TCGA-CR-7368-01A	54 years, male, white, stage:iva, alive, 1245 days	4
TCGA-CV-A463-01A	82 years, female, white, stage:iva, dead, 23 days	4
TCGA-CQ-5331-01A	73 years, female, white, alive, 1399 days	4
TCGA-CN-6998-01A	53 years, male, white, stage:iva, dead, 357 days	4
TCGA-D6-6516-01A	69 years, male, white, stage:i, alive, 773 days	4
TCGA-CQ-7071-01A	76 years, female, white, stage:iii, alive, 1311 days	3.9
TCGA-CR-6478-01A	66 years, female, white, dead, 183 days	3.9
TCGA-CV-A45P-01A	83 years, female, white, stage:i, alive, 639 days	3.9
TCGA-BA-4075-01A	49 years, male, black or african american, stage:iii, dead, 283 days	3.8
TCGA-CR-6491-01A	60 years, male, black or african american, stage:iva, alive, 693 days	3.8
TCGA-C9-A47Z-01A	72 years, female, asian, stage:iii, dead, 191 days	3.8
TCGA-CQ-6222-01A	63 years, male, white, stage:iva, alive, 2016 days	3.8
TCGA-CR-6477-01A	57 years, female, white, alive, 514 days	3.7
TCGA-CV-7102-01A	76 years, female, white, stage:iva, dead, 56 days	3.7
TCGA-CV-7183-01A	53 years, male, white, stage:ii, alive, 3981 days	3.7
TCGA-H7-7774-01A	75 years, female, white, stage:iva, alive, 407 days	3.7
TCGA-CR-7386-01A	69 years, male, white, stage:iva, alive, 1430 days	3.7
TCGA-CR-7397-01A	44 years, male, white, stage:iva, alive, 754 days	3.6
TCGA-CV-6436-01A	62 years, male, white, stage:iva, alive, 1899 days	3.6
TCGA-CR-7376-01A	84 years, male, white, stage:iii, alive, 972 days	3.6
TCGA-CV-6943-01A	74 years, male, white, stage:iii, dead, 602 days	3.6
TCGA-CN-4725-01A	60 years, male, white, stage:ii, alive, 1157 days	3.6
TCGA-DQ-7588-01A	66 years, male, white, dead, 427 days	3.5
TCGA-QK-A8ZB-01A	69 years, male, black or african american, stage:iva, alive, 542 days	3.5
TCGA-CN-4734-01A	70 years, male, white, stage:ii, alive, 1690 days	3.5
TCGA-CN-6018-01A	85 years, female, white, stage:iva, dead, 580 days	3.5
TCGA-F7-A624-01A	73 years, male, white, stage:ii, alive, 378 days	3.4
TCGA-CV-A6JY-01A	69 years, male, white, stage:iva, alive, 646 days	3.4
TCGA-CR-7392-01A	67 years, female, white, stage:iva, alive, 1425 days	3.4
TCGA-CN-4729-01A	73 years, male, white, stage:iii, alive, 392 days	3.4
TCGA-CN-5363-01A	48 years, male, black or african american, stage:ivb, dead, 253 days	3.3
TCGA-CR-7367-01A	52 years, male, white, stage:iva, alive, 1440 days	3.3
TCGA-CN-4740-01A	79 years, female, white, stage:iva, dead, 839 days	3.3
TCGA-CN-6995-01A	79 years, male, white, stage:iva, dead, 112 days	3.3
TCGA-CR-7377-01A	58 years, male, white, stage:iva, dead, 279 days	3.2
TCGA-CV-6934-01A	66 years, female, white, stage:iva, dead, 65 days	3.2
TCGA-MT-A51X-01A	30 years, male, white, stage:iva, alive, 242 days	3.2
TCGA-MT-A51W-01A	52 years, female, white, stage:i, alive, 437 days	3.2
TCGA-CR-6484-01A	67 years, female, asian, stage:iva, alive, 354 days	3.2
TCGA-CR-7394-01A	70 years, male, white, stage:iva, alive, 1346 days	3.1
TCGA-CV-A465-01A	24 years, male, white, stage:iii, dead, 215 days	3.1
TCGA-CR-7393-01A	26 years, male, white, stage:iii, alive, 993 days	3
TCGA-CX-7085-01A	77 years, female, white, stage:i, alive, 321 days	3
TCGA-CN-6017-01A	55 years, male, white, stage:iva, dead, 853 days	3
TCGA-CN-6019-01A	61 years, male, white, stage:iva, alive, 1038 days	3
TCGA-CV-7427-01A	73 years, female, white, stage:ii, dead, 4760 days	3
TCGA-IQ-A61J-01A	54 years, male, white, stage:iva, alive, 1021 days	2.9
TCGA-CV-7411-01A	64 years, female, white, stage:iva, dead, 2717 days	2.9
TCGA-CN-4728-01A	56 years, male, white, stage:iva, alive, 1724 days	2.9
TCGA-QK-A8ZA-01A	60 years, male, black or african american, dead, 371 days	2.9
TCGA-BA-5558-01A	65 years, male, white, alive, 1995 days	2.9
TCGA-CV-7429-01A	55 years, male, white, stage:iva, dead, 107 days	2.8
TCGA-BA-5557-01A	41 years, female, stage:iii, alive, 623 days	2.8
TCGA-CV-A45O-01A	57 years, male, white, alive, 851 days	2.8
TCGA-CV-A45V-01A	87 years, female, white, stage:iva, dead, 32 days	2.7
TCGA-CN-6020-01A	58 years, male, black or african american, stage:iii, dead, 205 days	2.7
TCGA-CN-5358-01A	60 years, male, white, stage:ii, dead, 261 days	2.7
TCGA-KU-A6H8-01A	41 years, male, white, stage:iva, dead, 327 days	2.7
TCGA-D6-6826-01A	64 years, female, white, stage:iva, dead, 348 days	2.7
TCGA-CQ-6220-01A	69 years, male, white, stage:iii, dead, 985 days	2.7
TCGA-BA-A6DA-01A	41 years, female, white, stage:iva, alive, 351 days	2.7
TCGA-CV-7413-01A	74 years, female, white, stage:ii, dead, 294 days	2.6
TCGA-CV-6955-01A	74 years, female, white, stage:ii, dead, 334 days	2.5
TCGA-CN-4726-01A	69 years, male, white, stage:iva, dead, 142 days	2.5
TCGA-HD-7831-01A	74 years, male, white, stage:iva, alive, 667 days	2.5
TCGA-CQ-6223-01A	69 years, male, white, stage:ii, alive, 1428 days	2.5
TCGA-CR-7391-01A	37 years, female, white, stage:i, alive, 913 days	2.4
TCGA-D6-6825-01A	73 years, male, white, stage:i, alive, 491 days	2.4
TCGA-CV-5971-01A	61 years, male, white, stage:iva, alive, 701 days	2.3
TCGA-CN-5370-01A	78 years, male, white, stage:iii, dead, 259 days	2.3
TCGA-CQ-6221-01A	79 years, male, white, alive, 1000 days	0.5
