# Supplementary material for: LPAR2 correlated with different prognosis and immune cell infiltration in head and neck squamous cell carcinoma and kidney renal clear cell carcinoma
Source: Hereditas. 2022 Mar 4;159:16. doi: 10.1186/s41065-022-00229-w (PMC8896370; doi:10.1186/s41065-022-00229-w)
Supplement: Supplementary file 3 — Addtional file 3: Table S3. Clinical characteristics of patients with KIRC in HPA. [file 41065_2022_229_MOESM3_ESM.xlsx]

## Sheet: Sheet1
Sample	Description	FPKM
TCGA-CJ-4642-01B	47 years, male, white, stage:ii, alive, 3205 days	21.9
TCGA-B8-4143-01A	66 years, female, white, stage:iv, dead, 709 days	17
TCGA-B0-5702-01A	71 years, male, white, stage:i, alive, 2172 days	15.5
TCGA-BP-4761-01A	57 years, male, white, stage:iii, alive, 182 days	14.9
TCGA-B0-4817-01A	81 years, male, white, stage:iii, dead, 1019 days	14.3
TCGA-B0-5098-01A	53 years, female, black or african american, stage:i, dead, 1584 days	14.1
TCGA-G6-A8L7-01A	81 years, female, black or african american, stage:i, alive, 2133 days	13.8
TCGA-B0-5084-01A	33 years, male, white, stage:iv, dead, 222 days	13.4
TCGA-B0-5400-01A	59 years, female, white, stage:iii, alive, 1733 days	12.6
TCGA-B0-5107-01A	65 years, female, white, stage:iv, dead, 927 days	10.8
TCGA-B0-4842-01A	74 years, female, white, stage:iii, dead, 1724 days	10.4
TCGA-B0-4815-01A	65 years, male, white, stage:iii, dead, 1588 days	10
TCGA-AK-3445-01A	69 years, male, white, stage:iii, alive, 2392 days	9.9
TCGA-BP-4992-01A	66 years, male, white, stage:i, alive, 501 days	9.4
TCGA-DV-A4VZ-01A	53 years, male, black or african american, stage:i, alive, 365 days	9.3
TCGA-B0-4697-01A	46 years, female, white, stage:iv, dead, 578 days	9.2
TCGA-BP-4352-01A	74 years, female, white, stage:iv, dead, 344 days	9.2
TCGA-AK-3426-01A	37 years, male, white, stage:iii, dead, 885 days	9
TCGA-B0-5109-01A	69 years, male, white, stage:iii, dead, 587 days	8.9
TCGA-CZ-5469-01A	41 years, male, white, stage:ii, dead, 946 days	8.9
TCGA-AK-3454-01A	84 years, male, white, stage:i, alive, 874 days	8.4
TCGA-CJ-4888-01A	59 years, male, white, stage:iv, dead, 1567 days	8.4
TCGA-BP-4354-01A	41 years, male, white, stage:iv, dead, 1034 days	8.4
TCGA-CJ-4882-01A	57 years, male, black or african american, stage:iii, alive, 1883 days	8.3
TCGA-BP-4771-01A	62 years, male, white, stage:iv, dead, 162 days	8.1
TCGA-CJ-4891-01A	57 years, female, white, stage:iii, dead, 819 days	8
TCGA-B0-4822-01A	78 years, male, white, stage:ii, dead, 1111 days	7.9
TCGA-B0-4819-01A	60 years, female, white, stage:iv, dead, 183 days	7.6
TCGA-DV-A4VX-01A	59 years, male, black or african american, stage:iv, dead, 1626 days	7.6
TCGA-A3-3346-01A	68 years, male, white, stage:i, dead, 137 days	7.6
TCGA-B0-5094-01A	62 years, male, white, stage:iv, dead, 333 days	7.5
TCGA-B0-4691-01A	55 years, male, white, stage:iv, dead, 139 days	7.4
TCGA-B0-5092-01A	53 years, female, white, stage:iv, dead, 459 days	7.2
TCGA-B0-5097-01A	59 years, female, white, stage:iii, alive, 665 days	7.1
TCGA-B0-4821-01A	68 years, female, asian, stage:iii, dead, 1230 days	7
TCGA-B0-4813-01A	68 years, male, white, stage:iii, dead, 18 days	7
TCGA-BP-4346-01A	57 years, male, white, stage:iii, dead, 1493 days	7
TCGA-B0-4700-01A	60 years, male, white, stage:iv, dead, 1980 days	6.9
TCGA-B0-4707-01A	63 years, male, white, stage:iii, dead, 600 days	6.8
TCGA-B0-4847-01A	60 years, male, white, stage:iv, dead, 793 days	6.8
TCGA-AK-3453-01A	58 years, female, white, stage:ii, alive, 2531 days	6.8
TCGA-CJ-4901-01A	47 years, male, white, stage:iii, alive, 1450 days	6.7
TCGA-CJ-4873-01A	85 years, female, white, stage:iii, alive, 2259 days	6.7
TCGA-B8-5159-01A	61 years, female, white, stage:i, alive, 722 days	6.6
TCGA-CJ-4869-01A	49 years, male, white, stage:iii, alive, 2554 days	6.6
TCGA-A3-3383-01A	52 years, male, white, stage:i, alive, 861 days	6.6
TCGA-CJ-4881-01A	41 years, male, white, stage:iii, alive, 2014 days	6.5
TCGA-CW-6087-01A	61 years, male, white, stage:iv, dead, 41 days	6.5
TCGA-A3-3378-01A	60 years, male, white, stage:i, alive, 630 days	6.5
TCGA-B0-4712-01A	76 years, male, white, stage:iv, dead, 1337 days	6.4
TCGA-CJ-4900-01A	69 years, female, white, stage:iv, dead, 1714 days	6.4
TCGA-CJ-5676-01A	47 years, male, white, stage:iii, alive, 4067 days	6.4
TCGA-CZ-5987-01A	60 years, male, white, stage:iv, dead, 445 days	6.3
TCGA-B0-4710-01A	75 years, female, white, stage:iii, alive, 1755 days	6.3
TCGA-CJ-4637-01A	52 years, female, white, stage:iv, dead, 2227 days	6.3
TCGA-B0-4836-01A	61 years, male, white, stage:iv, dead, 1238 days	6.2
TCGA-B0-5692-01A	66 years, female, white, stage:iii, alive, 3944 days	6.2
TCGA-BP-4971-01A	40 years, male, white, stage:iii, alive, 1487 days	6.2
TCGA-A3-3306-01A	67 years, male, white, stage:i, alive, 1120 days	6.1
TCGA-A3-3382-01A	69 years, male, white, stage:i, alive, 574 days	6.1
TCGA-BP-5169-01A	70 years, male, white, stage:i, alive, 193 days	6.1
TCGA-CJ-4895-01A	62 years, male, white, stage:iv, dead, 1200 days	6.1
TCGA-CZ-4860-01A	60 years, male, white, stage:iv, dead, 206 days	6
TCGA-CZ-5452-01A	69 years, male, white, stage:ii, alive, 1789 days	6
TCGA-CJ-4641-01A	55 years, female, white, stage:iv, dead, 1661 days	5.9
TCGA-B0-5096-01A	72 years, female, white, stage:iii, dead, 68 days	5.9
TCGA-B8-A54K-01A	61 years, male, black or african american, stage:i, alive, 469 days	5.9
TCGA-BP-4998-01A	49 years, male, asian, stage:i, alive, 932 days	5.9
TCGA-B0-4837-01A	63 years, male, white, stage:i, dead, 1378 days	5.9
TCGA-B8-A54D-01A	69 years, male, black or african american, stage:iii, alive, 830 days	5.9
TCGA-B0-5106-01A	64 years, male, white, stage:i, dead, 1598 days	5.8
TCGA-B8-A54G-01A	50 years, male, black or african american, stage:i, alive, 53 days	5.7
TCGA-CZ-4858-01A	39 years, male, white, stage:ii, dead, 2105 days	5.7
TCGA-CZ-5460-01A	55 years, male, white, stage:iv, alive, 2873 days	5.6
TCGA-B0-4816-01A	49 years, male, white, stage:ii, dead, 1371 days	5.6
TCGA-B0-5694-01A	71 years, male, white, stage:iii, dead, 480 days	5.6
TCGA-B8-5551-01A	65 years, female, black or african american, stage:i, alive, 16 days	5.6
TCGA-CZ-5462-01A	83 years, male, white, stage:iv, dead, 311 days	5.6
TCGA-CJ-4636-01A	51 years, male, white, stage:iii, alive, 1924 days	5.5
TCGA-BP-5178-01A	71 years, male, white, stage:iv, dead, 1912 days	5.5
TCGA-BP-4173-01A	47 years, male, white, stage:ii, alive, 1893 days	5.5
TCGA-CZ-5984-01A	51 years, male, white, stage:i, alive, 2067 days	5.5
TCGA-CJ-4638-01A	46 years, female, white, stage:iv, dead, 431 days	5.4
TCGA-BP-5180-01A	53 years, male, white, stage:i, alive, 2263 days	5.4
TCGA-BP-4784-01A	67 years, female, white, stage:i, alive, 1854 days	5.4
TCGA-BP-5196-01A	54 years, male, white, stage:i, alive, 1018 days	5.3
TCGA-CJ-4868-01A	42 years, male, white, stage:iv, dead, 646 days	5.3
TCGA-A3-A6NI-01A	47 years, male, black or african american, stage:i, alive, 1018 days	5.3
TCGA-CW-6097-01A	32 years, male, white, stage:iii, dead, 571 days	5.3
TCGA-MM-A84U-01A	58 years, female, black or african american, stage:i, alive, 700 days	5.2
TCGA-B0-4714-01A	81 years, male, white, stage:iv, dead, 99 days	5.2
TCGA-BP-4330-01A	60 years, female, black or african american, stage:iii, alive, 1888 days	5.2
TCGA-B0-4703-01A	51 years, male, white, stage:iv, dead, 182 days	5.2
TCGA-BP-4351-01A	51 years, female, white, stage:iii, alive, 970 days	5.2
TCGA-A3-3323-01A	53 years, male, white, stage:i, alive, 1106 days	5.1
TCGA-B4-5378-01A	62 years, male, white, stage:i, alive, 175 days	5.1
TCGA-BP-4760-01A	69 years, male, black or african american, stage:i, alive, 2361 days	5.1
TCGA-B0-4810-01A	47 years, male, white, stage:iii, dead, 478 days	5.1
TCGA-B2-5636-01A	79 years, male, white, stage:i, alive, 919 days	5.1
TCGA-BP-4798-01A	74 years, male, white, dead, 334 days	5
TCGA-B0-5088-01A	53 years, male, white, stage:i, dead, 563 days	5
TCGA-G6-A5PC-01A	54 years, female, black or african american, stage:iv, dead, 242 days	5
TCGA-B8-A54F-01A	49 years, female, black or african american, stage:i, alive, 519 days	5
TCGA-A3-3351-01A	42 years, male, white, stage:ii, alive, 910 days	4.9
TCGA-B0-4845-01A	70 years, male, white, stage:iv, dead, 1986 days	4.9
TCGA-B0-4844-01A	60 years, male, white, stage:iv, dead, 313 days	4.9
TCGA-BP-4967-01A	76 years, male, white, stage:iii, alive, 205 days	4.9
TCGA-BP-4985-01A	72 years, male, white, stage:iii, dead, 952 days	4.8
TCGA-B0-4706-01A	61 years, male, white, stage:iii, dead, 65 days	4.8
TCGA-B2-4101-01A	52 years, male, white, stage:ii, alive, 648 days	4.8
TCGA-BP-4161-01A	74 years, male, white, stage:i, alive, 2746 days	4.8
TCGA-CJ-4916-01A	69 years, female, white, stage:iii, alive, 1373 days	4.8
TCGA-CJ-4876-01A	57 years, male, white, stage:ii, alive, 1955 days	4.8
TCGA-BP-4342-01A	79 years, male, white, stage:ii, dead, 2256 days	4.8
TCGA-B0-4694-01A	72 years, male, white, stage:iii, dead, 106 days	4.8
TCGA-AS-3778-01A	35 years, male, white, stage:i, alive, 43 days	4.8
TCGA-CZ-4854-01A	68 years, male, white, stage:i, dead, 1404 days	4.8
TCGA-CZ-4866-01A	79 years, female, white, stage:i, alive, 3267 days	4.8
TCGA-BP-4989-01A	58 years, male, white, stage:iii, alive, 118 days	4.7
TCGA-B0-5075-01A	77 years, female, white, stage:iii, dead, 637 days	4.7
TCGA-CJ-4902-01A	61 years, male, white, stage:iii, alive, 1520 days	4.7
TCGA-A3-3335-01A	41 years, male, white, stage:ii, alive, 1886 days	4.7
TCGA-BP-4768-01A	72 years, female, white, stage:i, alive, 400 days	4.7
TCGA-B0-5712-01A	68 years, female, black or african american, stage:iv, alive, 2722 days	4.6
TCGA-B0-4848-01A	54 years, male, white, stage:iii, dead, 883 days	4.6
TCGA-CW-5580-01A	73 years, female, white, stage:iv, dead, 1964 days	4.6
TCGA-A3-3347-01A	76 years, female, white, stage:iii, dead, 1610 days	4.6
TCGA-A3-3329-01A	75 years, male, white, stage:i, alive, 1624 days	4.6
TCGA-B2-4098-01A	72 years, female, black or african american, stage:i, dead, 51 days	4.6
TCGA-CZ-5466-01A	67 years, male, stage:iii, alive, 685 days	4.6
TCGA-CZ-5456-01A	57 years, male, white, stage:ii, alive, 2422 days	4.6
TCGA-B0-5081-01A	80 years, female, white, stage:iii, dead, 362 days	4.5
TCGA-CJ-5677-01A	54 years, female, white, stage:iv, dead, 782 days	4.5
TCGA-B0-4827-01A	77 years, female, white, stage:iii, dead, 885 days	4.5
TCGA-CZ-5458-01A	43 years, male, white, stage:iii, alive, 2789 days	4.5
TCGA-EU-5905-01A	67 years, female, white, stage:i, alive, 119 days	4.5
TCGA-A3-3319-01A	70 years, male, white, stage:i, alive, 1130 days	4.5
TCGA-BP-5201-01A	63 years, male, white, stage:iv, alive, 951 days	4.5
TCGA-DV-5576-01A	55 years, female, black or african american, stage:i, dead, 727 days	4.5
TCGA-B2-4102-01A	61 years, male, white, stage:i, alive, 952 days	4.5
TCGA-CJ-5682-01A	60 years, male, white, stage:iv, alive, 3736 days	4.4
TCGA-B8-5158-01A	56 years, male, white, stage:iii, alive, 1218 days	4.4
TCGA-BP-5170-01A	55 years, male, white, stage:i, alive, 2412 days	4.4
TCGA-CZ-5459-01A	63 years, male, white, stage:iii, alive, 1683 days	4.4
TCGA-CZ-5464-01A	69 years, male, white, stage:iv, alive, 2128 days	4.3
TCGA-A3-3326-01A	47 years, male, white, stage:i, alive, 1137 days	4.3
TCGA-DV-5567-01A	40 years, female, black or african american, stage:i, alive, 2004 days	4.3
TCGA-AK-3450-01A	85 years, female, white, stage:i, alive, 1779 days	4.3
TCGA-CZ-5985-01A	58 years, male, white, stage:ii, alive, 1997 days	4.3
TCGA-CJ-4635-01A	48 years, male, white, stage:i, alive, 1416 days	4.3
TCGA-3Z-A93Z-01A	69 years, male, black or african american, stage:i, alive, 385 days	4.3
TCGA-BP-4337-01A	76 years, female, white, stage:iii, dead, 2 days	4.3
TCGA-B0-5120-01A	72 years, female, white, stage:i, alive, 1169 days	4.3
TCGA-A3-3352-01A	male, white, stage:iii, dead, 561 days	4.3
TCGA-B8-A54I-01A	48 years, male, black or african american, stage:i, alive, 150 days	4.3
TCGA-BP-4977-01A	57 years, male, white, stage:i, alive, 454 days	4.2
TCGA-AK-3436-01A	40 years, male, white, stage:iv, alive, 3331 days	4.2
TCGA-BP-5198-01A	72 years, male, white, stage:iii, alive, 603 days	4.2
TCGA-DV-5573-01A	41 years, male, white, stage:i, alive, 1130 days	4.2
TCGA-BP-4177-01A	65 years, male, white, stage:i, alive, 1670 days	4.2
TCGA-B2-5641-01A	79 years, male, white, stage:i, alive, 656 days	4.2
TCGA-BP-4962-01A	58 years, male, white, stage:ii, alive, 1785 days	4.2
TCGA-B8-4148-01A	63 years, female, white, stage:i, alive, 1520 days	4.1
TCGA-BP-4797-01A	34 years, male, white, stage:iii, alive, 1107 days	4.1
TCGA-CJ-5675-01A	70 years, male, white, stage:ii, alive, 3936 days	4.1
TCGA-B0-5701-01A	65 years, male, white, stage:iii, alive, 2461 days	4.1
TCGA-A3-3343-01A	79 years, male, white, stage:ii, alive, 945 days	4.1
TCGA-CZ-5461-01A	52 years, male, white, stage:iv, dead, 330 days	4.1
TCGA-BP-4983-01A	67 years, female, asian, stage:iii, alive, 1413 days	4
TCGA-B0-5100-01A	72 years, male, black or african american, stage:iii, dead, 1913 days	4
TCGA-BP-4973-01A	47 years, male, white, stage:iii, alive, 1384 days	4
TCGA-B0-4718-01A	57 years, male, white, stage:iii, alive, 1778 days	4
TCGA-BP-4804-01A	59 years, male, white, stage:i, alive, 1459 days	4
TCGA-BP-4331-01A	52 years, male, white, stage:i, dead, 2454 days	4
TCGA-CJ-4887-01A	48 years, male, white, stage:iv, dead, 932 days	4
TCGA-CJ-4884-01A	72 years, female, white, stage:iii, alive, 1759 days	4
TCGA-CJ-4920-01A	64 years, female, white, stage:i, dead, 139 days	4
TCGA-B0-4690-01A	65 years, male, white, stage:iv, dead, 43 days	4
TCGA-BP-5010-01A	63 years, male, white, stage:iii, dead, 878 days	4
TCGA-A3-3317-01A	67 years, male, stage:ii, alive, 1491 days	4
TCGA-CJ-6027-01A	77 years, male, white, stage:i, dead, 3615 days	3.9
TCGA-B0-4699-01A	74 years, male, white, stage:iv, dead, 110 days	3.9
TCGA-CZ-5468-01A	84 years, male, white, stage:iv, dead, 59 days	3.9
TCGA-BP-4327-01A	75 years, female, white, stage:ii, dead, 109 days	3.9
TCGA-CJ-5686-01A	59 years, female, white, stage:i, alive, 2038 days	3.9
TCGA-CJ-5678-01A	62 years, male, black or african american, stage:iv, dead, 574 days	3.9
TCGA-CW-5590-01A	51 years, male, white, stage:iv, dead, 1075 days	3.9
TCGA-BP-4332-01A	36 years, male, white, stage:iii, alive, 1133 days	3.9
TCGA-CJ-5680-01A	65 years, female, white, stage:iv, dead, 768 days	3.9
TCGA-B0-4713-01A	76 years, female, white, stage:iii, dead, 202 days	3.9
TCGA-BP-4781-01A	78 years, male, white, stage:i, alive, 2080 days	3.9
TCGA-AK-3429-01A	54 years, female, white, stage:ii, alive, 3328 days	3.8
TCGA-BP-5007-01A	46 years, male, white, stage:ii, alive, 1140 days	3.8
TCGA-BP-4163-01A	60 years, female, white, stage:iii, alive, 2839 days	3.8
TCGA-BP-5175-01A	60 years, male, white, stage:i, alive, 932 days	3.8
TCGA-B0-4828-01A	79 years, male, white, stage:iv, dead, 307 days	3.8
TCGA-BP-4176-01A	64 years, male, white, stage:i, alive, 1955 days	3.8
TCGA-CZ-4862-01A	46 years, male, white, stage:i, alive, 3271 days	3.8
TCGA-B0-4843-01A	57 years, male, white, stage:iii, dead, 320 days	3.8
TCGA-BP-5183-01A	57 years, male, white, stage:iii, alive, 1291 days	3.8
TCGA-BP-4329-01A	75 years, male, white, stage:iii, dead, 845 days	3.8
TCGA-CJ-5671-01A	51 years, male, white, stage:i, alive, 3987 days	3.8
TCGA-B4-5838-01A	52 years, male, white, alive, 166 days	3.8
TCGA-B0-5095-01A	81 years, male, white, stage:iii, dead, 245 days	3.7
TCGA-A3-3331-01A	86 years, female, white, stage:i, alive, 1485 days	3.7
TCGA-B2-5633-01B	56 years, male, white, stage:i, alive, 963 days	3.7
TCGA-BP-4769-01A	63 years, male, white, stage:i, alive, 1876 days	3.7
TCGA-BP-4986-01A	75 years, male, white, stage:i, alive, 785 days	3.7
TCGA-CZ-4861-01A	63 years, male, white, stage:ii, dead, 446 days	3.7
TCGA-BP-4775-01A	55 years, female, white, stage:i, alive, 1843 days	3.7
TCGA-BP-4790-01A	76 years, male, white, stage:i, dead, 1111 days	3.7
TCGA-A3-A6NL-01A	49 years, female, black or african american, stage:i, alive, 689 days	3.7
TCGA-B0-5102-01A	74 years, female, white, stage:i, dead, 2764 days	3.7
TCGA-CJ-6031-01A	54 years, male, white, stage:i, alive, 1906 days	3.7
TCGA-B0-5113-01A	69 years, female, white, stage:iii, alive, 1175 days	3.7
TCGA-BP-4981-01A	75 years, female, white, stage:iii, dead, 1097 days	3.6
TCGA-BP-4756-01A	63 years, female, asian, stage:i, alive, 374 days	3.6
TCGA-A3-3325-01A	52 years, male, white, stage:i, dead, 1170 days	3.6
TCGA-CJ-4918-01A	64 years, male, white, stage:iv, dead, 93 days	3.6
TCGA-MM-A563-01A	41 years, male, black or african american, alive, 591 days	3.6
TCGA-CJ-4894-01A	58 years, male, white, stage:iii, dead, 841 days	3.6
TCGA-BP-5181-01A	58 years, female, white, stage:i, alive, 1495 days	3.6
TCGA-B0-5699-01A	53 years, male, white, stage:i, alive, 3841 days	3.6
TCGA-CJ-6028-01A	58 years, male, white, stage:iv, dead, 1625 days	3.6
TCGA-BP-4795-01A	74 years, female, white, stage:i, alive, 620 days	3.6
TCGA-BP-4167-01A	60 years, male, white, stage:iii, alive, 2718 days	3.6
TCGA-BP-5189-01A	60 years, male, white, stage:i, dead, 822 days	3.6
TCGA-A3-3357-01A	62 years, male, white, stage:ii, alive, 2688 days	3.6
TCGA-BP-4349-01A	68 years, female, white, stage:i, alive, 372 days	3.6
TCGA-B8-4620-01A	70 years, female, white, stage:iii, alive, 777 days	3.5
TCGA-BP-5199-01A	58 years, male, white, stage:ii, alive, 1355 days	3.5
TCGA-B8-A54H-01A	69 years, female, black or african american, stage:ii, alive, 256 days	3.5
TCGA-A3-3324-01A	51 years, male, white, stage:i, alive, 1186 days	3.5
TCGA-CJ-6033-01A	54 years, female, white, stage:iv, dead, 224 days	3.5
TCGA-B0-4701-01A	66 years, female, white, stage:iv, dead, 238 days	3.5
TCGA-BP-4968-01A	40 years, male, white, stage:i, alive, 1746 days	3.5
TCGA-B0-4811-01A	48 years, male, white, stage:iii, dead, 1417 days	3.5
TCGA-B0-5080-01A	63 years, male, white, stage:iv, dead, 342 days	3.5
TCGA-AK-3451-01A	48 years, male, white, stage:ii, alive, 2868 days	3.5
TCGA-BP-5187-01A	54 years, male, white, stage:i, alive, 406 days	3.5
TCGA-BP-5191-01A	80 years, male, white, stage:iii, alive, 967 days	3.4
TCGA-BP-4355-01A	59 years, female, white, stage:iii, dead, 953 days	3.4
TCGA-B0-4696-01A	58 years, male, white, stage:iii, dead, 866 days	3.4
TCGA-CJ-5672-01A	84 years, male, white, stage:i, dead, 2190 days	3.4
TCGA-B2-5639-01A	46 years, male, white, stage:iv, dead, 1003 days	3.4
TCGA-BP-5001-01A	43 years, female, white, stage:i, alive, 1177 days	3.4
TCGA-A3-3359-01A	82 years, female, white, stage:i, alive, 2504 days	3.4
TCGA-CJ-4640-01A	49 years, male, white, stage:iii, alive, 3480 days	3.4
TCGA-BP-4759-01A	50 years, male, white, stage:i, alive, 2372 days	3.4
TCGA-BP-4964-01A	55 years, female, white, stage:i, alive, 1862 days	3.4
TCGA-MM-A564-01A	68 years, male, black or african american, stage:ii, alive, 607 days	3.4
TCGA-A3-3349-01A	34 years, female, white, stage:i, alive, 1385 days	3.4
TCGA-B0-4852-01A	78 years, female, white, stage:ii, dead, 1121 days	3.4
TCGA-B0-4833-01A	82 years, female, white, stage:i, dead, 2386 days	3.4
TCGA-BP-4991-01A	54 years, male, white, stage:i, alive, 1413 days	3.4
TCGA-BP-4959-01A	49 years, male, white, stage:i, alive, 2660 days	3.3
TCGA-A3-3387-01A	49 years, male, white, stage:i, alive, 617 days	3.3
TCGA-BP-4963-01A	64 years, male, white, stage:i, alive, 1834 days	3.3
TCGA-B0-5707-01A	39 years, female, white, stage:i, alive, 3744 days	3.3
TCGA-A3-3308-01A	77 years, female, white, stage:iii, alive, 16 days	3.3
TCGA-AK-3425-01A	68 years, male, white, stage:i, alive, 3343 days	3.3
TCGA-BP-5008-01A	46 years, male, white, stage:i, alive, 1071 days	3.3
TCGA-B8-5549-01A	53 years, male, white, stage:i, alive, 194 days	3.3
TCGA-BP-5009-01A	52 years, male, white, stage:i, dead, 1092 days	3.3
TCGA-B0-4698-01A	75 years, male, white, stage:iv, dead, 42 days	3.3
TCGA-BP-4776-01A	52 years, male, white, stage:i, alive, 411 days	3.3
TCGA-BP-5000-01A	40 years, male, white, stage:i, alive, 563 days	3.3
TCGA-BP-4801-01A	57 years, male, white, stage:i, alive, 1124 days	3.3
TCGA-DV-5568-01A	26 years, male, white, stage:i, alive, 370 days	3.3
TCGA-CZ-4857-01A	56 years, male, white, stage:iv, dead, 1432 days	3.2
TCGA-BP-4326-01A	53 years, female, white, stage:i, dead, 1625 days	3.2
TCGA-BP-4325-01A	64 years, female, white, stage:i, alive, 2964 days	3.2
TCGA-B0-4818-01A	68 years, female, white, stage:ii, dead, 510 days	3.2
TCGA-BP-5174-01A	45 years, female, white, stage:i, alive, 2257 days	3.2
TCGA-B0-4838-01A	69 years, female, white, stage:i, dead, 834 days	3.2
TCGA-BP-4803-01A	79 years, male, white, stage:iii, alive, 204 days	3.2
TCGA-B0-4824-01A	49 years, female, white, stage:i, dead, 1657 days	3.2
TCGA-BP-4960-01A	46 years, male, white, stage:ii, alive, 2172 days	3.2
TCGA-BP-4774-01A	57 years, female, white, stage:i, alive, 1885 days	3.2
TCGA-B0-4693-01A	73 years, female, white, stage:iii, dead, 77 days	3.2
TCGA-B8-4622-01A	57 years, male, white, stage:iv, alive, 1525 days	3.1
TCGA-CJ-4890-01A	72 years, male, white, stage:iv, alive, 3519 days	3.1
TCGA-A3-3316-01A	57 years, male, white, stage:ii, alive, 1493 days	3.1
TCGA-CJ-4912-01A	61 years, male, white, stage:ii, alive, 1657 days	3.1
TCGA-BP-5195-01A	75 years, male, white, stage:i, alive, 749 days	3.1
TCGA-CJ-4892-01A	65 years, female, white, stage:i, alive, 1521 days	3.1
TCGA-DV-5569-01A	29 years, female, white, stage:i, alive, 355 days	3
TCGA-BP-4165-01A	64 years, female, white, stage:i, alive, 3037 days	3
TCGA-AK-3461-01A	72 years, male, white, stage:i, alive, 2217 days	3
TCGA-CJ-4875-01A	67 years, male, white, stage:iv, dead, 3554 days	3
TCGA-BP-4169-01A	76 years, female, white, stage:ii, dead, 701 days	3
TCGA-G6-A8L8-01A	62 years, female, black or african american, stage:i, dead, 1091 days	3
TCGA-A3-3311-01A	58 years, male, stage:i, dead, 1191 days	3
TCGA-B0-4945-01A	75 years, female, white, stage:i, dead, 2145 days	3
TCGA-B4-5836-01A	61 years, female, white, stage:i, alive, 141 days	2.9
TCGA-A3-3367-01A	72 years, male, white, stage:i, alive, 2270 days	2.9
TCGA-A3-3363-01A	50 years, male, asian, stage:ii, alive, 319 days	2.9
TCGA-CJ-4908-01A	38 years, male, white, stage:i, alive, 1531 days	2.9
TCGA-A3-A8OV-01A	75 years, male, black or african american, stage:i, alive, 340 days	2.9
TCGA-CZ-4865-01A	70 years, female, white, stage:i, dead, 166 days	2.9
TCGA-B0-4814-01A	58 years, male, white, stage:iv, dead, 168 days	2.9
TCGA-B0-5108-01A	54 years, male, white, stage:iii, alive, 1782 days	2.9
TCGA-B0-5697-01A	50 years, male, white, stage:i, alive, 2630 days	2.9
TCGA-BP-4787-01A	59 years, female, white, stage:iv, dead, 480 days	2.9
TCGA-A3-A8CQ-01A	59 years, female, black or african american, stage:i, alive, 3 days	2.9
TCGA-BP-4961-01A	47 years, male, white, stage:i, alive, 1935 days	2.8
TCGA-B0-5399-01A	46 years, male, white, stage:i, alive, 1411 days	2.8
TCGA-A3-3380-01A	54 years, male, stage:i, alive, 567 days	2.8
TCGA-B2-4099-01A	83 years, male, white, stage:i, alive, 972 days	2.8
TCGA-CZ-5470-01A	72 years, female, stage:ii, alive, 386 days	2.8
TCGA-B2-A4SR-01A	62 years, male, black or african american, stage:ii, alive, 507 days	2.8
TCGA-B0-5077-01A	77 years, male, white, stage:i, dead, 1317 days	2.8
TCGA-BP-4170-01A	72 years, female, white, stage:i, dead, 2343 days	2.8
TCGA-AK-3458-01A	48 years, male, white, stage:i, alive, 1168 days	2.8
TCGA-AK-3431-01A	62 years, female, white, stage:ii, dead, 2241 days	2.8
TCGA-A3-A6NN-01A	78 years, male, black or african american, stage:i, alive, 3 days	2.8
TCGA-A3-3370-01A	48 years, female, white, stage:i, alive, 2274 days	2.8
TCGA-B4-5843-01A	45 years, male, white, stage:i, alive, 11 days	2.8
TCGA-BP-4807-01A	42 years, male, white, stage:i, alive, 211 days	2.8
TCGA-BP-4970-01A	44 years, male, asian, stage:iii, alive, 433 days	2.8
TCGA-CZ-5451-01A	74 years, male, white, stage:ii, alive, 1929 days	2.8
TCGA-CJ-4871-01A	63 years, male, white, stage:iv, alive, 2423 days	2.7
TCGA-CZ-5988-01A	38 years, male, white, stage:i, alive, 693 days	2.7
TCGA-CJ-4907-01A	58 years, male, white, stage:iii, alive, 1499 days	2.7
TCGA-CJ-6030-01A	66 years, male, white, stage:i, dead, 2299 days	2.7
TCGA-BP-4162-01A	65 years, female, white, stage:i, alive, 3074 days	2.7
TCGA-A3-3307-01A	66 years, male, stage:iii, alive, 1436 days	2.7
TCGA-BP-4347-01A	74 years, male, white, stage:iii, alive, 1367 days	2.7
TCGA-G6-A8L6-01A	55 years, male, black or african american, stage:iv, dead, 313 days	2.7
TCGA-B8-A7U6-01A	54 years, female, black or african american, stage:i, alive, 495 days	2.7
TCGA-B0-5085-01A	76 years, female, white, stage:iii, dead, 770 days	2.7
TCGA-B8-A54J-01A	60 years, male, black or african american, stage:ii, alive, 528 days	2.7
TCGA-BP-4974-01A	58 years, male, white, stage:iv, dead, 211 days	2.7
TCGA-A3-3322-01A	51 years, male, white, stage:i, alive, 1478 days	2.7
TCGA-B0-5711-01A	50 years, male, white, stage:iii, alive, 3989 days	2.7
TCGA-B0-5402-01A	64 years, male, white, stage:iv, alive, 1290 days	2.6
TCGA-B0-4849-01A	51 years, male, white, stage:iii, dead, 69 days	2.6
TCGA-B0-5099-01A	88 years, female, white, stage:iii, dead, 485 days	2.6
TCGA-BP-4335-01A	65 years, female, white, stage:iv, dead, 475 days	2.6
TCGA-B0-5703-01A	73 years, male, white, stage:i, alive, 2246 days	2.6
TCGA-CJ-4872-01A	51 years, male, white, stage:i, alive, 326 days	2.6
TCGA-B8-5545-01A	42 years, male, black or african american, stage:i, alive, 1525 days	2.6
TCGA-BP-4766-01A	43 years, female, white, stage:i, alive, 1462 days	2.6
TCGA-B8-A8YJ-01A	60 years, female, black or african american, stage:i, alive, 431 days	2.6
TCGA-BP-5168-01A	75 years, male, white, stage:i, dead, 1463 days	2.6
TCGA-B0-4839-01A	80 years, female, white, stage:i, dead, 1639 days	2.6
TCGA-B0-5115-01A	43 years, male, white, stage:iv, alive, 1604 days	2.6
TCGA-CJ-4886-01A	43 years, female, white, stage:i, alive, 1952 days	2.5
TCGA-CJ-4897-01A	79 years, female, white, stage:iii, alive, 3341 days	2.5
TCGA-CW-5584-01A	74 years, male, white, stage:iii, dead, 164 days	2.5
TCGA-B0-5119-01A	61 years, female, white, stage:i, alive, 1552 days	2.5
TCGA-A3-A8OW-01A	37 years, male, black or african american, stage:iii, alive, 323 days	2.5
TCGA-A3-3362-01A	60 years, female, white, stage:i, alive, 1559 days	2.5
TCGA-BP-5182-01A	56 years, male, white, stage:i, alive, 1165 days	2.5
TCGA-AK-3427-01A	65 years, male, white, stage:i, alive, 3583 days	2.5
TCGA-B8-5553-01A	67 years, female, white, stage:i, alive, 435 days	2.5
TCGA-BP-4763-01A	79 years, female, white, stage:i, dead, 1270 days	2.5
TCGA-B0-5706-01A	45 years, male, white, stage:ii, alive, 3205 days	2.5
TCGA-BP-4334-01A	56 years, male, white, stage:iii, dead, 645 days	2.5
TCGA-B8-4153-01B	74 years, male, white, stage:iii, alive, 762 days	2.5
TCGA-CJ-4874-01A	73 years, female, white, stage:i, alive, 2283 days	2.4
TCGA-CJ-4889-01A	63 years, female, white, stage:i, alive, 1946 days	2.4
TCGA-AK-3455-01A	71 years, female, white, stage:iii, dead, 683 days	2.4
TCGA-CZ-4863-01A	51 years, female, white, stage:iii, alive, 1928 days	2.4
TCGA-EU-5907-01A	81 years, male, white, stage:iii, alive, 127 days	2.4
TCGA-BP-4777-01A	46 years, male, white, stage:i, alive, 1731 days	2.4
TCGA-CJ-4899-01A	42 years, male, asian, stage:i, alive, 1528 days	2.4
TCGA-B0-4688-01A	46 years, male, white, stage:iv, dead, 101 days	2.4
TCGA-BP-5190-01A	61 years, male, white, stage:i, alive, 1011 days	2.4
TCGA-B8-5164-01A	65 years, male, white, stage:iii, alive, 26 days	2.4
TCGA-BP-4164-01A	51 years, female, white, stage:iii, dead, 992 days	2.4
TCGA-BP-4166-01A	69 years, male, white, stage:iii, alive, 13 days	2.4
TCGA-B0-4846-01A	52 years, male, white, stage:iv, dead, 1200 days	2.4
TCGA-BP-4341-01A	67 years, male, white, stage:iii, dead, 1589 days	2.4
TCGA-B0-5116-01A	53 years, male, white, stage:iii, alive, 1274 days	2.4
TCGA-BP-4344-01A	75 years, female, white, stage:i, alive, 1666 days	2.3
TCGA-MW-A4EC-01A	73 years, female, black or african american, stage:i, alive, 498 days	2.3
TCGA-B0-5709-01A	62 years, female, white, stage:iii, alive, 3974 days	2.3
TCGA-CZ-4856-01A	62 years, female, white, stage:i, alive, 18 days	2.3
TCGA-CJ-4893-01A	76 years, female, white, stage:i, alive, 750 days	2.3
TCGA-BP-4982-01A	42 years, male, white, stage:i, alive, 1014 days	2.3
TCGA-CZ-5454-01A	63 years, male, white, stage:iv, dead, 722 days	2.3
TCGA-A3-3374-01A	51 years, female, black or african american, stage:i, alive, 1314 days	2.3
TCGA-CZ-4853-01A	82 years, male, white, stage:i, alive, 774 days	2.3
TCGA-BP-4993-01A	58 years, male, white, stage:i, alive, 177 days	2.3
TCGA-A3-3358-01A	57 years, female, white, stage:i, alive, 1307 days	2.3
TCGA-B0-5104-01A	90 years, female, white, stage:i, dead, 2752 days	2.3
TCGA-BP-4975-01A	40 years, male, white, stage:i, alive, 1433 days	2.3
TCGA-B0-5812-01A	53 years, male, white, stage:i, alive, 3834 days	2.3
TCGA-B0-5698-01A	77 years, male, black or african american, stage:i, alive, 3631 days	2.3
TCGA-CW-5587-01A	62 years, female, white, stage:iii, alive, 2226 days	2.2
TCGA-BP-4158-01A	69 years, male, white, stage:i, alive, 3377 days	2.2
TCGA-B8-5550-01A	71 years, male, white, stage:iii, alive, 1476 days	2.2
TCGA-B0-5691-01A	66 years, female, white, stage:i, alive, 3431 days	2.2
TCGA-CZ-4864-01A	86 years, male, white, stage:ii, dead, 2830 days	2.2
TCGA-BP-4987-01A	41 years, female, asian, stage:i, alive, 1124 days	2.2
TCGA-B0-5690-01A	53 years, female, white, stage:i, alive, 3392 days	2.2
TCGA-A3-3372-01A	64 years, male, white, stage:iii, alive, 735 days	2.2
TCGA-BP-4353-01A	61 years, male, white, stage:i, dead, 375 days	2.2
TCGA-CW-6090-01A	68 years, male, white, stage:i, alive, 2552 days	2.2
TCGA-A3-3376-01A	51 years, male, black or african american, stage:i, dead, 1696 days	2.2
TCGA-B8-4621-01A	63 years, male, black or african american, stage:i, alive, 788 days	2.2
TCGA-B8-5163-01A	63 years, female, white, stage:iii, alive, 822 days	2.2
TCGA-BP-4338-01A	43 years, male, white, stage:i, alive, 2859 days	2.2
TCGA-B0-5696-01A	70 years, male, white, stage:iii, alive, 2609 days	2.2
TCGA-B8-5162-01A	63 years, male, white, stage:ii, alive, 36 days	2.2
TCGA-B8-5552-01B	41 years, female, white, stage:i, alive, 1046 days	2.2
TCGA-CJ-4644-01A	48 years, female, white, stage:iv, dead, 336 days	2.1
TCGA-6D-AA2E-01A	68 years, female, black or african american, stage:i, alive, 362 days	2.1
TCGA-CW-6088-01A	60 years, male, white, stage:i, alive, 3222 days	2.1
TCGA-CW-5589-01A	52 years, male, white, stage:i, alive, 2378 days	2.1
TCGA-BP-4758-01A	40 years, male, white, stage:i, alive, 2208 days	2.1
TCGA-BP-4972-01A	43 years, female, white, stage:iii, alive, 1502 days	2.1
TCGA-BP-5185-01A	56 years, male, white, stage:i, alive, 1132 days	2.1
TCGA-CW-5591-01A	56 years, male, white, stage:iv, alive, 2271 days	2.1
TCGA-CJ-4903-01A	50 years, male, white, stage:i, alive, 1559 days	2.1
TCGA-BP-4345-01A	62 years, male, white, stage:iii, alive, 1516 days	2.1
TCGA-B8-4154-01A	73 years, female, white, stage:i, alive, 1380 days	2
TCGA-CW-5583-01A	51 years, female, white, stage:i, alive, 2489 days	2
TCGA-DV-5574-01A	37 years, male, white, stage:i, alive, 2016 days	2
TCGA-DV-A4W0-01A	55 years, male, black or african american, stage:i, alive, 2470 days	2
TCGA-EU-5904-01A	47 years, female, white, stage:i, alive, 551 days	2
TCGA-AK-3428-01A	62 years, male, white, stage:iii, alive, 3728 days	2
TCGA-CZ-5463-01A	76 years, male, white, stage:ii, alive, 662 days	2
TCGA-BP-5006-01A	61 years, male, white, stage:i, alive, 840 days	2
TCGA-CJ-5679-01A	73 years, male, white, stage:iii, dead, 679 days	2
TCGA-BP-4789-01A	48 years, male, white, stage:i, alive, 1489 days	2
TCGA-CJ-4639-01A	49 years, female, white, stage:ii, alive, 3229 days	2
TCGA-B0-5710-01A	57 years, male, white, stage:i, alive, 2430 days	2
TCGA-CZ-5465-01A	76 years, female, stage:iii, dead, 2564 days	2
TCGA-B0-5713-01A	75 years, female, white, stage:iii, alive, 2782 days	2
TCGA-BP-4782-01A	55 years, female, white, stage:i, alive, 354 days	2
TCGA-B0-5693-01A	47 years, female, white, stage:i, alive, 4074 days	1.9
TCGA-BP-5177-01A	46 years, female, white, stage:i, alive, 293 days	1.9
TCGA-B0-5110-01A	71 years, female, white, stage:i, alive, 2009 days	1.9
TCGA-A3-A6NJ-01A	57 years, female, black or african american, stage:i, alive, 468 days	1.9
TCGA-BP-4969-01A	63 years, female, white, stage:i, alive, 1794 days	1.9
TCGA-A3-3365-01A	46 years, male, white, stage:i, alive, 873 days	1.9
TCGA-CZ-5467-01A	86 years, female, white, stage:iii, dead, 73 days	1.9
TCGA-B0-5083-01A	63 years, male, white, stage:i, dead, 1045 days	1.9
TCGA-AK-3434-01A	72 years, male, white, stage:i, alive, 2087 days	1.9
TCGA-B0-5121-01A	56 years, male, white, stage:i, alive, 1485 days	1.8
TCGA-AK-3456-01A	48 years, male, black or african american, stage:ii, alive, 1143 days	1.8
TCGA-B0-4823-01A	88 years, male, white, stage:i, dead, 454 days	1.8
TCGA-CZ-5455-01A	63 years, male, white, stage:iv, dead, 561 days	1.8
TCGA-A3-3328-01A	79 years, male, white, stage:i, alive, 1385 days	1.8
TCGA-BP-4343-01A	64 years, male, white, stage:iii, dead, 1912 days	1.8
TCGA-A3-3320-01A	52 years, female, white, stage:i, alive, 1508 days	1.8
TCGA-CW-5581-01A	44 years, male, white, stage:i, alive, 2799 days	1.8
TCGA-B8-5165-01A	43 years, male, white, stage:i, alive, 737 days	1.8
TCGA-BP-4174-01A	49 years, male, white, stage:ii, alive, 1879 days	1.8
TCGA-CJ-5683-01A	78 years, male, white, stage:i, alive, 1889 days	1.8
TCGA-BP-5194-01A	39 years, male, white, stage:i, alive, 408 days	1.7
TCGA-CJ-4643-01A	67 years, female, white, stage:ii, alive, 1793 days	1.7
TCGA-T7-A92I-01A	47 years, female, black or african american, stage:i, alive, 356 days	1.7
TCGA-CJ-4878-01A	71 years, female, white, stage:iii, alive, 2186 days	1.7
TCGA-B0-5700-01A	77 years, male, white, stage:i, alive, 1790 days	1.7
TCGA-CJ-4885-01A	64 years, male, white, stage:iv, alive, 3451 days	1.7
TCGA-BP-4762-01A	42 years, male, white, stage:i, dead, 1343 days	1.6
TCGA-BP-4994-01A	54 years, male, white, stage:i, alive, 1308 days	1.6
TCGA-AK-3433-01A	48 years, female, white, stage:ii, alive, 3409 days	1.6
TCGA-AK-3460-01A	58 years, male, white, stage:i, alive, 2508 days	1.6
TCGA-BP-4159-01A	70 years, male, white, stage:i, dead, 2601 days	1.6
TCGA-CZ-5453-01A	67 years, male, white, stage:ii, dead, 2419 days	1.6
TCGA-A3-3385-01A	46 years, female, white, stage:i, alive, 1993 days	1.6
TCGA-BP-4160-01A	67 years, male, white, stage:iii, alive, 2881 days	1.6
TCGA-BP-4765-01A	43 years, male, white, stage:i, alive, 2184 days	1.6
TCGA-CW-5588-01A	78 years, female, white, stage:i, alive, 2017 days	1.6
TCGA-BP-4999-01A	56 years, male, white, stage:i, alive, 1266 days	1.5
TCGA-BP-5184-01A	54 years, male, white, stage:i, alive, 1133 days	1.5
TCGA-BP-5200-01A	44 years, male, white, stage:ii, alive, 1063 days	1.5
TCGA-BP-4995-01A	68 years, male, white, stage:i, alive, 1371 days	1.5
TCGA-B8-4619-01A	58 years, male, white, stage:i, alive, 523 days	1.5
TCGA-CJ-6032-01A	63 years, female, white, stage:ii, alive, 3639 days	1.5
TCGA-BP-4976-01A	77 years, male, white, stage:i, alive, 1632 days	1.5
TCGA-BP-5202-01A	75 years, male, white, stage:iii, alive, 29 days	1.5
TCGA-B8-4151-01A	51 years, female, white, stage:iii, alive, 1299 days	1.5
TCGA-B2-3924-01A	73 years, male, white, stage:i, alive, 1092 days	1.5
TCGA-B4-5835-01A	64 years, female, white, stage:i, alive, 16 days	1.4
TCGA-CZ-5457-01A	62 years, male, white, stage:iii, alive, 2754 days	1.4
TCGA-CJ-5684-01A	61 years, male, white, stage:iii, alive, 2231 days	1.4
TCGA-BP-4965-01A	46 years, male, white, stage:i, alive, 1871 days	1.4
TCGA-AS-3777-01A	63 years, male, white, stage:i, alive, 1238 days	1.4
TCGA-BP-4340-01A	70 years, female, white, stage:i, dead, 562 days	1.4
TCGA-BP-5004-01A	53 years, male, white, stage:i, alive, 1126 days	1.4
TCGA-DV-5575-01A	52 years, female, white, stage:i, alive, 1729 days	1.4
TCGA-B0-4841-01A	63 years, male, white, stage:iv, dead, 204 days	1.3
TCGA-B2-5635-01A	74 years, male, white, stage:i, alive, 755 days	1.3
TCGA-CW-5585-01A	51 years, male, white, stage:iv, alive, 2609 days	1.3
TCGA-CJ-5689-01A	90 years, male, white, stage:i, dead, 1620 days	1.2
TCGA-EU-5906-01A	55 years, male, white, stage:i, alive, 206 days	1.2
TCGA-CJ-4904-01A	60 years, female, white, stage:iv, alive, 3302 days	1.2
TCGA-A3-3313-01A	59 years, male, black or african american, stage:i, dead, 735 days	1.2
TCGA-CJ-4634-01A	60 years, female, white, stage:i, alive, 3498 days	1.2
TCGA-BP-5186-01A	50 years, female, white, stage:i, alive, 693 days	1.2
TCGA-DV-5566-01A	67 years, female, white, stage:i, alive, 1398 days	1.2
TCGA-AK-3443-01A	45 years, male, white, stage:ii, alive, 1423 days	1.2
TCGA-BP-4799-01A	70 years, male, white, stage:iii, dead, 1133 days	1.1
TCGA-BP-5173-01A	75 years, male, white, stage:i, dead, 62 days	1.1
TCGA-CZ-5986-01A	61 years, male, white, stage:i, alive, 373 days	1
TCGA-GK-A6C7-01A	77 years, female, black or african american, stage:i, alive, 61 days	1
TCGA-BP-5192-01A	59 years, male, white, stage:i, alive, 714 days	1
TCGA-CZ-5982-01A	59 years, female, white, stage:i, alive, 2439 days	1
TCGA-CJ-4870-01A	58 years, female, black or african american, stage:iii, alive, 1498 days	1
TCGA-B4-5834-01A	59 years, male, white, stage:i, alive, 26 days	1
TCGA-BP-5176-01A	78 years, female, white, stage:i, dead, 1590 days	0.9
TCGA-B0-5117-01A	40 years, male, white, stage:i, alive, 1608 days	0.9
TCGA-DV-5565-01A	59 years, male, white, stage:i, alive, 1329 days	0.9
TCGA-AK-3440-01A	58 years, male, white, stage:i, alive, 2865 days	0.9
TCGA-CW-6093-01A	73 years, male, white, stage:i, alive, 3146 days	0.8
TCGA-AK-3447-01A	84 years, male, white, stage:ii, alive, 1217 days	0.8
TCGA-B4-5377-01A	68 years, female, white, stage:iv, alive, 365 days	0.8
TCGA-B8-5546-01A	38 years, female, black or african american, stage:i, alive, 505 days	0.7
TCGA-AK-3465-01A	71 years, female, black or african american, stage:i, alive, 369 days	0.7
TCGA-B0-5705-01A	65 years, female, white, stage:i, alive, 4537 days	0.7
TCGA-B0-4834-01A	49 years, male, white, stage:i, dead, 2090 days	0.7
TCGA-B2-3923-01A	59 years, male, white, stage:ii, alive, 992 days	0.7
TCGA-B4-5832-01A	65 years, male, white, stage:iii, alive, 155 days	0.6
TCGA-B8-A54E-01A	62 years, female, black or african american, stage:i, alive, 909 days	0.6
TCGA-CJ-4905-01A	62 years, female, white, stage:i, alive, 1496 days	0.5
TCGA-B8-4146-01B	41 years, female, white, stage:i, alive, 511 days	0.5
TCGA-B4-5844-01A	61 years, female, white, stage:ii, alive, 7 days	0.5
TCGA-BP-4770-01A	73 years, female, white, stage:iv, dead, 329 days	0.5
TCGA-CZ-4859-01A	59 years, female, white, stage:i, alive, 1787 days	0.5
TCGA-B0-5695-01A	61 years, female, white, stage:i, alive, 2150 days	0.4
TCGA-A3-3373-01A	54 years, female, white, stage:i, alive, 1621 days	0.4
TCGA-CJ-5681-01A	44 years, female, white, stage:iv, dead, 552 days	0.3
TCGA-CZ-5989-01A	60 years, male, white, stage:ii, alive, 1905 days	0.3
